# Supplementary material for: Photocatalytic reduction of CO2 over platinised Bi2WO6-based materials
Source: Royal Society of Chemistry journal article supplement (doi:10.1039/c4pp00407h), 2014-12-19
Supplement: c4pp00407h1.pdf [file c4pp00407h1.pdf]

Supporting Information

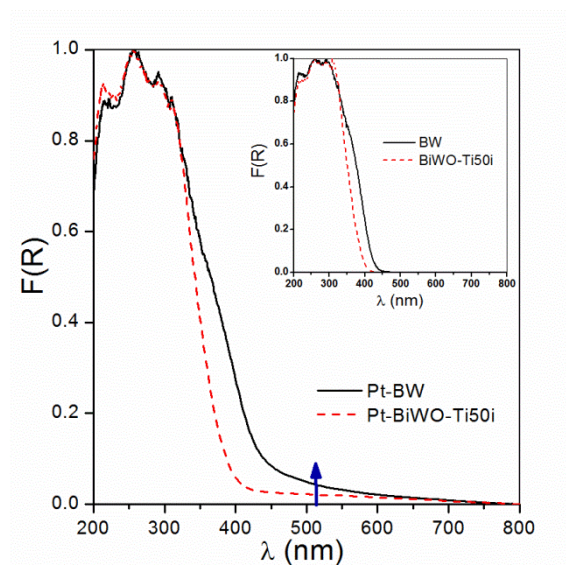

Figure S1. UV-vis diffuse reflectance spectra of the platinised photocatalysts. In the inset, the corresponding spectra of the non-platinised materials.

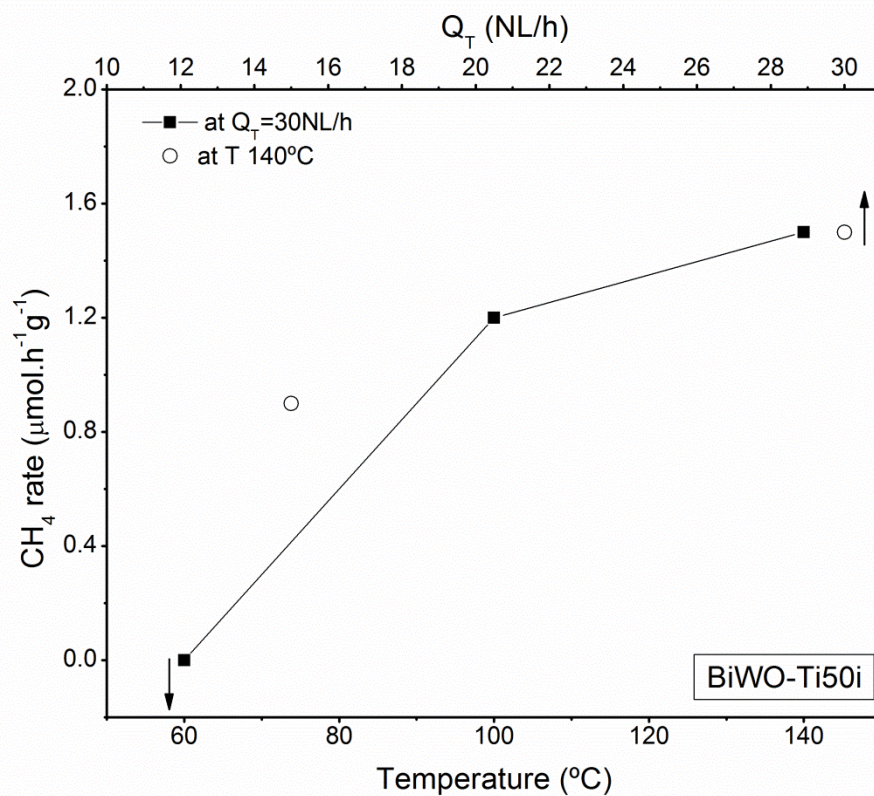

Figure S2. Preliminary tests with BiWO-Ti50i at different temperature (black) and total volume flow (white) conditions.

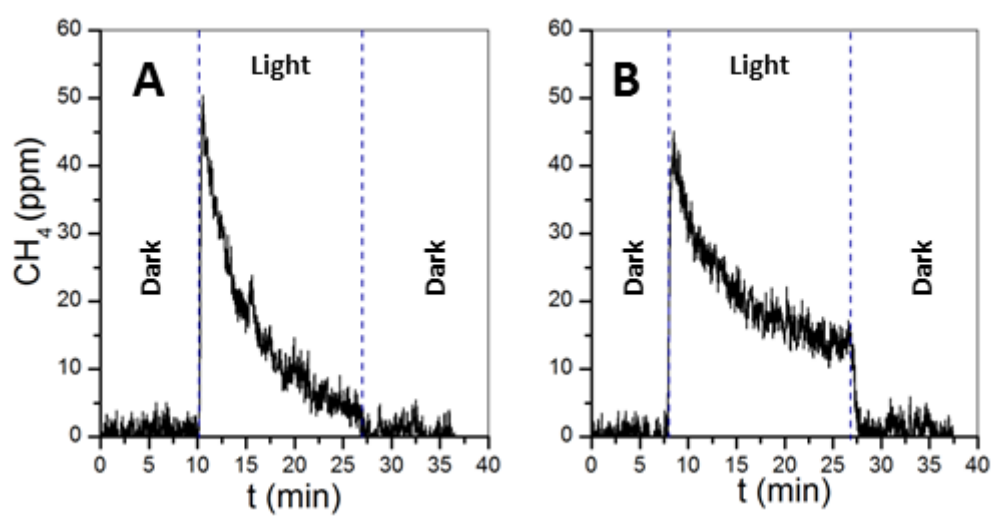

Figure S3. Evolution of the  $\text{CH}_4$  signal during the photocatalytic tests with Pt-BiWO-Ti50i without (A) and with blue phosphors (B).
